# Supplementary material for: Toxicity of graphene oxide to naked oats (Avena sativa L.) in hydroponic and soil cultures
Source: Royal Society of Chemistry journal article supplement (doi:10.1039/c8ra01753k), 2018-01-01
Supplement: c8ra01753k1.pdf [file c8ra01753k1.pdf]

### Electronic supplementary information

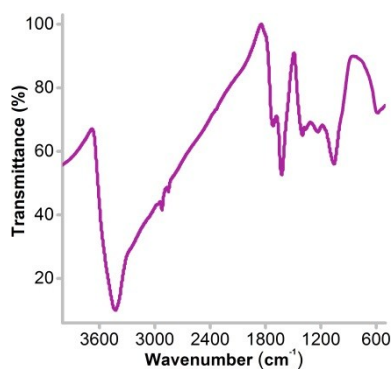

**Fig. S1** IR spectrum of GO.

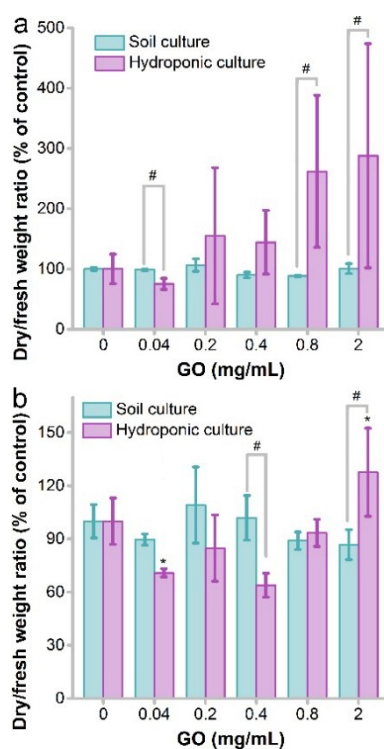

**Fig. S2** Dry/fresh weight ratio of naked oats exposed to GO in soil culture and hydroponic culture (n=5). (a) root samples; (b) aboveground parts. \*  $p < 0.05$  comparing to the control group; #  $p < 0.05$  between soil and hydroponic culture.

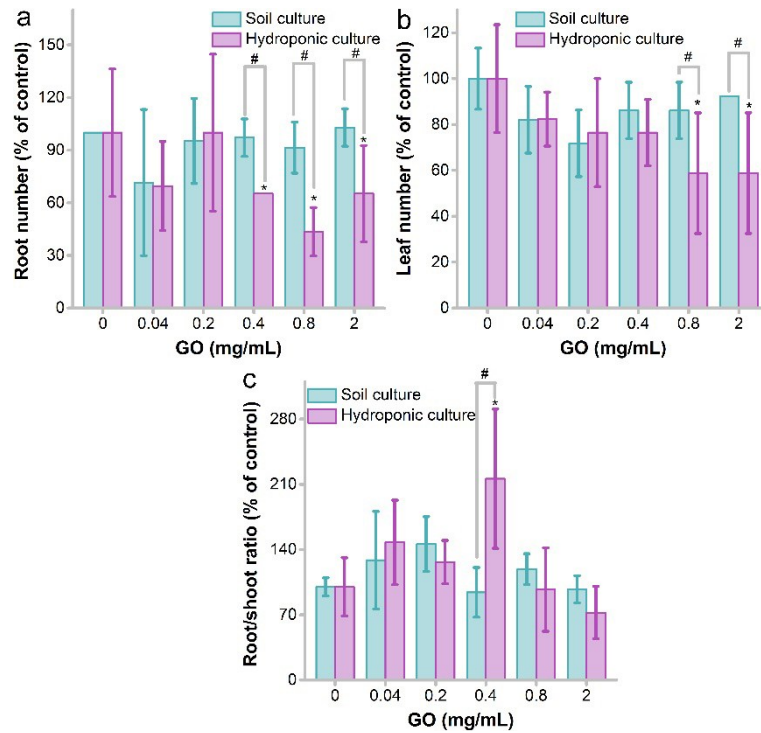

**Fig. S3** (a) root number, (b) leaf number and (c) root/shoot ratio of naked oats exposed to GO in soil culture and hydroponic culture (n=5). \*  $p < 0.05$  comparing to the control group; #  $p < 0.05$  between soil and hydroponic culture.

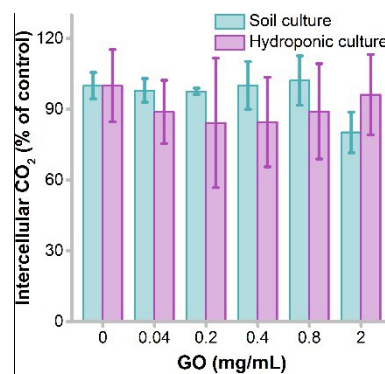

**Fig. S4** Intracellular CO<sub>2</sub> level of naked oats exposed to GO in soil culture and hydroponic culture (n=5).

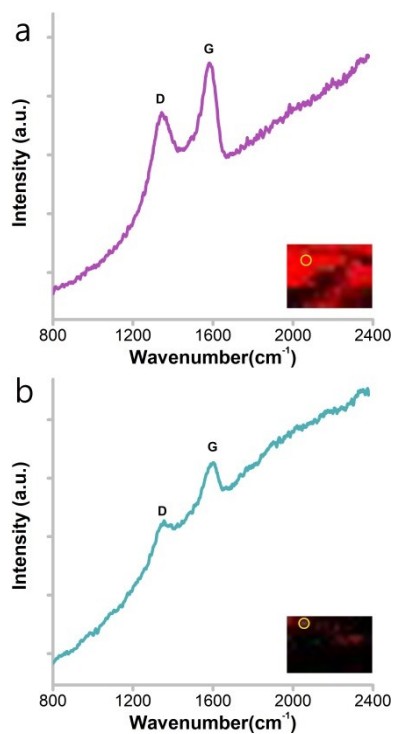

**Fig. S5** Raman spectra of GO attached on the roots of naked oat. (a) hydroponic culture; (b) soil culture. The insets are the 2D mapping of G band intensity on the root surface ( $60\mu\text{m} \times 40\mu\text{m}$ ). The spectra were collected from the datum points of highest intensity as indicated by the circles.

**Table S1** Statistical results of Two-way ANOVA for “GO concentration” and “Cultivation mode”. \*  $p < 0.05$ .

| Source                        | Measurement data source                        | Type<br>IIIsum<br>of<br>squares | df    | Mean<br>square | F      | Sig    |
|-------------------------------|------------------------------------------------|---------------------------------|-------|----------------|--------|--------|
| GO<br>concentration           | Root number                                    | 0.647                           | 5     | 0.129          | 2.035  | 0.093  |
|                               | Aboveground part length                        | 1.688                           | 5     | 0.338          | 3.797  | 0.006* |
|                               | Root/shoot ratio                               | 3.407                           | 5     | 0.681          | 3.807  | 0.006* |
|                               | Chlorophyll                                    | 0.856                           | 5     | 0.171          | 3.497  | 0.010* |
|                               | Root length                                    | 3.675                           | 5     | 0.735          | 4.564  | 0.002* |
|                               | Leaf number                                    | 0.459                           | 5     | 0.092          | 2.235  | 0.068  |
|                               | Fresh weight of aboveground<br>parts           | 2.647                           | 5     | 0.529          | 6.405  | 0.001* |
|                               | Dry weight of aboveground<br>parts             | 1.700                           | 5     | 0.340          | 5.029  | 0.003* |
|                               | Dry/fresh weight ratio of<br>aboveground parts | 0.319                           | 5     | 0.064          | 2.381  | 0.070  |
|                               | Fresh weight of root                           | 2.744                           | 5     | 0.549          | 5.114  | 0.003* |
|                               | Dry weight of root                             | 1.721                           | 5     | 0.344          | 3.503  | 0.017* |
|                               | Dry/fresh weight ratio of root                 | 5.172                           | 5     | 1.034          | 1.186  | 0.346  |
|                               | Net photosynthetic rate                        | 3.933                           | 5     | 0.787          | 14.816 | 0.000* |
|                               | Transpiration                                  | 4.209                           | 5     | 0.842          | 8.716  | 0.000* |
|                               | Stomatal conductance                           | 5.294                           | 5     | 1.059          | 7.179  | 0.000* |
|                               | Intracellular CO <sub>2</sub> level            | 0.160                           | 5     | 0.032          | 0.468  | 0.798  |
|                               | GSH                                            | 57.151                          | 5     | 11.430         | 22.847 | 0.000* |
|                               | MDA                                            | 2.700                           | 5     | 0.540          | 7.957  | 0.001* |
| CAT                           | 2.683                                          | 5                               | 0.537 | 2.621          | 0.068  |        |
| H <sub>2</sub> O <sub>2</sub> | 2.262                                          | 5                               | 0.452 | 9.149          | 0.000* |        |
| Cultivation<br>mode           | Root number                                    | 0.705                           | 1     | 0.705          | 11.085 | 0.002* |
|                               | Aboveground part length                        | 0.106                           | 1     | 0.106          | 1.191  | 0.281  |
|                               | Root/shoot ratio                               | 0.204                           | 1     | 0.204          | 1.142  | 0.291  |
|                               | Chlorophyll                                    | 0.555                           | 1     | 0.555          | 11.342 | 0.002* |
|                               | Root length                                    | 0.006                           | 1     | 0.006          | 0.040  | 0.843  |
|                               | Leaf number                                    | 0.158                           | 1     | 0.158          | 3.845  | 0.056  |
|                               | Fresh weight of aboveground<br>parts           | 0.072                           | 1     | 0.072          | 0.869  | 0.361  |
|                               | Dry weight of aboveground<br>parts             | 0.009                           | 1     | 0.009          | 0.137  | 0.715  |
|                               | Dry/fresh weight ratio of<br>aboveground parts | 0.031                           | 1     | 0.031          | 1.152  | 0.294  |
|                               | Fresh weight of root                           | 0.070                           | 1     | 0.070          | 0.656  | 0.426  |

|               |                                             |        |   |       |        |        |
|---------------|---------------------------------------------|--------|---|-------|--------|--------|
|               | Dry weight of root                          | 0.105  | 1 | 0.105 | 1.067  | 0.312  |
|               | Dry/fresh weight ratio of root              | 4.661  | 1 | 4.661 | 5.345  | 0.030* |
|               | Net photosynthetic rate                     | 0.918  | 1 | 0.918 | 17.286 | 0.000* |
|               | Transpiration                               | 1.010  | 1 | 1.010 | 10.457 | 0.002* |
|               | Stomatal conductance                        | 0.602  | 1 | 0.602 | 4.083  | 0.049* |
|               | Intracellular CO <sub>2</sub> level         | 0.061  | 1 | 0.061 | 0.889  | 0.351  |
|               | GSH                                         | 1.248  | 1 | 1.248 | 2.494  | 0.135  |
|               | MDA                                         | 0.106  | 1 | 0.106 | 1.559  | 0.231  |
|               | CAT                                         | 6.204  | 1 | 6.204 | 30.305 | 0.000* |
|               | H <sub>2</sub> O <sub>2</sub>               | 3.438  | 1 | 3.438 | 69.530 | 0.000* |
|               | Root number                                 | 0.489  | 5 | 0.098 | 1.536  | 0.199  |
|               | Aboveground part length                     | 0.843  | 5 | 0.169 | 1.896  | 0.115  |
|               | Root/shoot ratio                            | 3.868  | 5 | 0.774 | 4.323  | 0.003* |
|               | Chlorophyll                                 | 0.879  | 5 | 0.176 | 3.590  | 0.008* |
|               | Root length                                 | 3.555  | 5 | 0.711 | 4.414  | 0.002* |
|               | Leaf number                                 | .288   | 5 | 0.058 | 1.400  | 0.243  |
|               | Fresh weight of aboveground parts           | 3.017  | 5 | 0.603 | 7.300  | 0.000* |
|               | Dry weight of aboveground parts             | 1.155  | 5 | 0.231 | 3.416  | 0.019* |
| GO            | Dry/fresh weight ratio of aboveground parts | 0.576  | 5 | 0.115 | 4.295  | 0.007* |
| concentration | Fresh weight of root                        | 1.752  | 5 | 0.350 | 3.265  | 0.023* |
| * Cultivation | Dry weight of root                          | 0.992  | 5 | 0.198 | 2.018  | 0.114  |
| mode          | Dry/fresh weight ratio of root              | 5.509  | 5 | 1.102 | 1.264  | 0.313  |
|               | Net photosynthetic rate                     | 1.583  | 5 | 0.317 | 5.962  | 0.000* |
|               | Transpiration                               | 1.227  | 5 | 0.245 | 2.541  | 0.041* |
|               | Stomatal conductance                        | 1.861  | 5 | 0.372 | 2.524  | 0.043* |
|               | Intracellular CO <sub>2</sub> level         | 0.095  | 5 | 0.019 | 0.278  | 0.923  |
|               | GSH                                         | 22.371 | 4 | 5.593 | 11.179 | 0.000* |
|               | MDA                                         | 3.770  | 4 | 0.943 | 13.887 | 0.000* |
|               | CAT                                         | 3.645  | 4 | 0.911 | 4.452  | 0.014* |
|               | H <sub>2</sub> O <sub>2</sub>               | 6.043  | 4 | 1.511 | 30.553 | 0.000* |
